# Supplementary material for: The plasma membrane H+-ATPase promoter enables highly efficient production of punicic acid in Rhodotorula toruloides cultivated on glucose and crude glycerol
Source: Research Square preprint supplement (doi:10.21203/rs.3.rs-4774339/v1), 2024-08-08
Supplement: Supplementary file 1 [file 5f2a5fa33ccb7e17170a3546.docx]

**Supplementary Material**

**The plasma membrane H+-ATPase promoter enables highly efficient production of punicic acid in *Rhodotorula toruloides* cultivated on glucose and crude glycerol.**

**Table S1.** Primers used in this study.

| **Primer** | **Sequence (5′-3′)** | **Description** |
| --- | --- | --- |
| pZPK-ERI-pPGI-F2 | gaattaacgccgaattgaattcGCCGTCTGCCACTTTATCGTC | Amplification of P*PGI1* promoter |
| pPGI-PgFADX-Rt-R2 | gtgccgtccgcgcccatGGTTCGTAGCGTGGTGAGTGAGAA |
| pZPK-ERI-pNar1-4-F | gaattaacgccgaattgaattcCAACGTCGGCCCGCCTT | Amplification of P*NAR1*promoter |
| pNar1-PgFADX-Rt-R | gtgccgtccgcgcccatGTTCGTGGGTCGTTCTTCTGGG |
| pZPK_ERI_pPMA1_F | gaattaacgccgaattgaattcCGATACGAGCAAAGAAGCGGC | Amplification of P*PMA1* promoter |
| pPMA1_PgFADX_Rt_R | gtgccgtccgcgcccatGGCCGAGTGTTGCGCAGAG |  |
| PgFADX_Rt_F | ATGGGCGCGGACGGC | Verification of *PgFADX* integration |
| Rt_tPMA1_R1 | ATATGCGAAGGCGAGAGCGAG |  |

**Table S2.** Promoter, codon optimized *PgFADX*, and terminator sequences.

| **Name** | **Sequence (5′-3′)** |
| --- | --- |
| **P*PGI1*** | gccgtctgccactttatcgtcgcgggctgctcgacggccttgtcgcaggacaacgaggcgggtcagaaggtgttgattgggttcgtgtgtgtgtttatcgcgttctttgcggcgacttggtgaggcctgttctttccgcctttcgcgagaacagcagactgacgacttcgcttcaccaggggtccaatcgcatgggtcgtgtacgctaccactcctcgcattctccgcgttgagctgagctgattcgggcttgctcgcagcacgagcgaaatctacgcgacggcgactcgggcgaaacagatgtcgatgtctgtcgcttccaactggctcttcagtgcgtcgtctctccctccattcctccctccacgcttcacctcagctgaacgaaccgctggacgcgcgcagatttcggtatcggttacgcgactccttgttcgtctcctcccctttccgctcttcaggccgagagctgaccagccttccatgcgcgcagatctcgtcaatactggcaaaggaaacgcgggtcttcagggcaaggtgttcttcatcgtgcgtcccgacccgttcttgctccctctttcgctcatgcggagggatgagtttgctgacgaggtatatgaatcgcgcagtggggcggtgtatcgtgcatcgcgattctgtttgtgtacttgtgcgtcactcccttccccgccgcgctgcgacaaagcggcaggctgacgaccgacttgtacagctgtattcccgagaccaagggtctctcgctcgaacaaagtccgccgcccattctgcctcgcacgcgttgtcgaatgaagtcactgacgcttgcgctaccgcagtcgacatcttataccgcctaaccggcaacgcgatccgggcgaccaagatccgccgcgaactgtgcgttccgctgtccctcctgctctccgcccatgtactgatgtcgtttctcgcctgcgcgcagcctcgagcgcgacatccaagacgaggacaccgccgcttacttctacgccttcaaggagcaacacctcggctcctcccttcacgagctcgagcagcaccaaggctcttcctccgacccgcagcaaccgcagcatcaccaagtccagctgcagcaggacgagctcgcaccggtcgagagtccagcggtcaaaatgcgggacttgaacgaggcgtgaaggaccgcggacgggttgtacgacttcgcaggcgcatagactaacggggacggcttagacgcacactagacatagatctctcctctcgcatagacggctcgctgcccttgttgtagctcgtacggttgctctcgtcggaattcgaggatgttgccctcttgacctcgcctgatcccgttcggtccagcgttggcgtcaacaagaggatatactggaccgctaggaattgcaagcaagcccatcggagcgacttgctgaatgacgccctcatcgggcccactcgctcgtcgctttcgctctcttctcactcaccacgctacgaacc |
| **P*NAR1*** | caacgtcggcccgccttgtcccaggtcgccgactgtcctatcgcaacactgcaactgtagcgctgttcgaaccggagaccttgcggcgcgatccgagggcaaagtcgtgcatttgcgaaacggtatccgctcgaagggctcacgcgctcacgatagacctcgaccggcctcggacttggcgccagggtcgcttccgatgacggacagcaactctggctctgggcgtcgtcgctgctgcgatccactttgcgggtccccttatcgcgactgctggatccgagattggcggtatctttcgctcgctggtcttgttggacagctggacagcctctgcagcgtcgaagcgacgtcgataaactccagcgacacgctcacaatcccagaagaacgacccacgaac |
| **P*PMA1*** | cgatacgagcaaagaagcggctcgagagcgagacgggatcccctgctgtcaaattccgatccgaaccaccgacaagccgacgaaagacggccggccggcggacggcacacgagcgggaagggcgcaaagaactcagcgcgggtccgcctcgcgcttctgctgtttttggggagtaagttagtgagtggtcgggatgatcgcttcgaggaaaagatagcgagtctagtctaggtcgaggagcaggagcaggagcagagcagggagaggaggcgggacgaggagcgcgagtctcctctctggtcgttccggccggatccgcggagtatgatgctattgctgagttagccagcccgagccaagggaggctgtgagtgcacgagaagagcgcaaccaacggagcacagtgagcgcttgcttgagcgaaaaggacgagaagagcgagaggggtttcgctcgcgccgtctgttgccccgggatccgcgttatctatcgcagcagtgggaagcgagaggagagtgcactctcgagcaggagtgagagagtggcgcagctgagagagagagtgcgagggagagtgaactgtgcccgagtccctcgcgccgaagtgctgagtccgaggagtggctccgtcatggcgaggtgagagagctggggccagcgtacagtagtgtgcgaaactgcgaagtgagggcggggtgcgaaaatgtgcgagggagagagtccgtccgccgagcgcgggtgcgctgggggtcgaagaggaggtcggcgtcggcgcgagctgagcgagacgggtgctgctctttctctctctcttgctcttgttcttgactccagaagagcgtctcccactctttctgaacccccgtacgaaagagcaaggcactcgagcccaacttcggcctcgcccgcatccagccagccagcccgcctcgctctctctctttccctctttctcttcttcttcttcacccgacaactctgcgcaacactcggcc |
| ***PgFADX* (codon optimized)** | ATGGGCGCGGACGGCACCATGTCGCCGGTCCTCACGAAGCGCCGCCCGGACCAGGAGATCAACAAGCTCGACATCAAGCCGAACCACGAGGTCGACATCGCCCGCCGCGCCCCCCACTCCAAGCCCCCGTTCACGCTCTCGGACCTCCGCTCGGCCATCCCGCCCCACTGCTTCCACCGCTCGCTCCTCATGTCGTCGTCGTACCTCATCCGCGACTTCGCCCTCGCCTTCCTCTTCTACCACTCGGCGGTCACGTACATCCCCCTCCTCCCGAAGCCGCTCGCCTGCATGGCGTGGCCGGTCTACTGGTTCCTCCAGGGCTCGAACATGCTCGGCATCTGGGTCATCGCGCACGAGTGCGGCCACCAGGCGTTCTCGAACTACGGCTGGGTCAACGACGCGGTCGGCTTCTTCCTCCACACGTCGCTCCTCGTCCCCTACTTCCCGTTCAAGTACTCGCACCGCCGCCACCACTCCAACACCAACTCCGTCGAGCACGACGAGGTCTTCGTCCCCCGCCACAAGGACGGCGTCCAGTGGTACTACCGCTTCTTCAACAACACCCCGGGCCGCGTCCTCACCCTCACGCTCACGCTCCTCGTCGGCTGGCCGTCGTACCTCGCGTTCAACGCGTCGGGCCGCCCGTACGACGGCTTCGCGTCCCACTACAACCCGAACGCGCAGATCTTCAACCTCCGCGAGCGCTTCTGGGTCCACGTCTCGAACATCGGCATCCTCGCGATCTACTACATCCTCTACCGCCTCGCGACGACCAAGGGCCTCCCGTGGCTCCTCTCGATCTACGGCGTCCCGGTCCTCATCCTCAACGCCTTCGTCGTCCTCATCACGTTCCTCCAGCACTCGCACCCGGCGCTCCCGCACTACAACTCGGACGAGTGGGACTGGCTCCGCGGCGCGCTCGCGACGGTCGACCGCGACTACGGCTTCCTCAACGAGGTCTTCCACGACATCACGGACACGCACGTCATCCACCACCTCTTCCCGACCATGCCCCACTACAACGCCAAGGAGGCGACCGTCTCGATCCGCCCGATCCTCAAGGACTACTACAAGTTCGACCGCACCCCGATCTGGCGCGCGCTCTGGCGCGAGGCCAAGGAGTGCCTCTACGTCGAGGCGGACGGCACGGGCTCCAAGGGCGTCCTCTGGTTCAAGTCGAAGTTCTAG |
| **T*PMA1*** | gcctgtgcttcgcctagactgcgattcggctccagttcctttcgcctttctcccgcttttccctttcatcgttagtcccctccatccccgtcgtctccccctcgctctcgccttcgcatattccccccctcacatccgctcgtctctccgcgtgctctctctctctcgctctctcgtcgttaatatcagactcacacaagttcctagagtacacaaagactggttcttcgcacatcgttcgttcgccgtgagaggaggagaggagaggagagcaagttggtctgtctacccgtcccgccgcttcgcttcgcttcgcttggcctgtcgcttgtctgctcgtgtgcctgctagcacagtactgctgctcgagccatccgttcaccgccgtcgccatcgccgccgccgactgtctgctcctgtcctcgacttccgcaactccgctctttacgcctcatcat |
|  |  |

**Table S3.** Fatty acid composition of wild type strain IFO0880 and *PgFADX-*expressing strains cultivated in MedA+ medium containing 6% glucose for 72 h, 120 h, and 168 h.

| **72 h** | **IFO** | **PGI26** | **PGI28** | **NAR13** | **NAR16** | **PMA5** | **PMA6** |
| --- | --- | --- | --- | --- | --- | --- | --- |
| **C16:0** | 20.31 ± 0.28 | 22.07 ± 0.64 | 21.27 ± 0.39 | 20.10 ± 0.08 | 20.04 ± 0.64 | 21.47 ± 0.31 | 20.08 ± 0.12 |
| **C16:1** | 0.26 ± 0.01 | 0.30 ± 0.02 | 0.28 ± 0.01 | 0.25 ± 0.01 | 0.24 ± 0.01 | 0.39 ± 0.04 | 0.35 ± 0.01 |
| **C18:0** | 13.30 ± 0.37 | 11.04 ± 0.50 | 11.39 ± 0.33 | 12.50 ± 0.14 | 12.90 ± 0.37 | 9.61 ± 0.11 | 9.60 ± 0.18 |
| **C18:1** | 46.28 ± 0.08 | 50.86 ± 0.04 | 51.73 ± 0.19 | 52.50 ± 0.01 | 52.09 ± 0.16 | 54.52 ± 0.21 | 56.41 ± 0.02 |
| **C18:2** | 13.70 ± 0.03 | 11.37 ± 0.04 | 11.07 ± 0.11 | 9.87 ± 0.06 | 9.78 ± 0.05 | 10.13 ± 0.25 | 9.29 ± 0.03 |
| **C18:3** | 2.97 ± 0.06 | 1.83 ± 0.07 | 2.03 ± 0.07 | 2.41 ± 0.03 | 2.58 ± 0.04 | 0.83 ± 0.03 | 0.66 ± 0.04 |
| **PuA** | - | 0.13 ± 0.00 | 0.10 ± 0.00 | 0.13 ± 0.00 | 0.07 ± 0.00 | 0.97 ± 0.11 | 1.32 ± 0.06 |
| **C20:0** | 0.42 ± 0.01 | 0.37 ± 0.01 | 0.37 ± 0.01 | 0.40 ± 0.01 | 0.41 ± 0.01 | 0.34 ± 0.01 | 0.35 ± 0.01 |
| **C22:0** | 0.74 ± 0.02 | 0.61 ± 0.00 | 0.57 ± 0.02 | 0.60 ± 0.01 | 0.62 ± 0.01 | 0.54 ± 0.01 | 0.57 ± 0.01 |
| **C24:0** | 2.06 ± 0.05 | 1.44 ± 0.01 | 1.21 ± 0.05 | 1.25 ± 0.04 | 1.31 ± 0.01 | 1.22 ± 0.02 | 1.41 ± 0.04 |
| **SFA** | 36.81 ± 0.18 | 35.53 ± 0.13 | 34.80 ± 0.02 | 34.84 ± 0.13 | 35.27 ± 0.24 | 33.17 ± 0.22 | 31.99 ± 0.04 |
| **MUFA** | 46.54 ± 0.09 | 51.16 ± 0.02 | 52.01 ± 0.18 | 52.75 ± 0.03 | 52.33 ± 0.15 | 54.91 ± 0.16 | 56.75 ± 0.01 |
| **PUFA** | 16.67 ± 0.09 | 13.33 ± 0.11 | 13.20 ± 0.18 | 12.41 ± 0.09 | 12.43 ± 0.09 | 11.92 ± 0.38 | 11.27 ± 0.05 |
| **MUFA/PUFA** | 2.79 ± 0.01 | 3.84 ± 0.03 | 3.94 ± 0.07 | 4.25 ± 0.03 | 4.21 ± 0.02 | 4.61 ± 0.16 | 5.04 ± 0.02 |
| **UFA/SFA** | 1.72 ± 0.01 | 1.82 ± 0.01 | 1.87 ± 0.00 | 1.87 ± 0.01 | 1.84 ± 0.02 | 2.01 ± 0.02 | 2.13 ± 0.00 |
| **120 h** | **IFO** | **PGI26** | **PGI28** | **NAR13** | **NAR16** | **PMA5** | **PMA6** |
| **C16:0** | 20.16 ± 0.06 | 21.68 ± 0.74 | 20.79 ± 0.30 | 19.81 ± 0.04 | 19.76 ± 0.56 | 21.18 ± 0.14 | 19.89 ± 0.15 |
| **C16:1** | 0.27 ± 0.00 | 0.30 ± 0.03 | 0.28 ± 0.01 | 0.26 ± 0.01 | 0.24 ± 0.01 | 0.35 ± 0.01 | 0.35 ± 0.01 |
| **C18:0** | 12.83 ± 0.26 | 10.74 ± 0.40 | 11.12 ± 0.27 | 11.88 ± 0.07 | 12.34 ± 0.32 | 9.36 ± 0.11 | 9.31 ± 0.16 |
| **C18:1** | 46.63 ± 0.03 | 51.03 ± 0.21 | 52.18 ± 0.07 | 52.87 ± 0.00 | 52.50 ± 0.22 | 54.62 ± 0.16 | 56.33 ± 0.15 |
| **C18:2** | 14.01 ± 0.17 | 11.85 ± 0.09 | 11.34 ± 0.07 | 10.46 ± 0.01 | 10.26 ± 0.01 | 10.62 ± 0.19 | 9.94 ± 0.11 |
| **C18:3** | 3.25 ± 0.13 | 1.99 ± 0.06 | 2.02 ± 0.04 | 2.42 ± 0.01 | 2.58 ± 0.01 | 0.95 ± 0.03 | 0.74 ± 0.00 |
| **PuA** | - | 0.12 ± 0.00 | 0.10 ± 0.00 | 0.13 ± 0.01 | 0.07 ± 0.00 | 0.98 ± 0.01 | 1.27 ± 0.03 |
| **C20:0** | 0.41 ± 0.01 | 0.35 ± 0.01 | 0.35 ± 0.01 | 0.37 ± 0.01 | 0.38 ± 0.01 | 0.31 ± 0.00 | 0.32 ± 0.00 |
| **C22:0** | 0.69 ± 0.03 | 0.58 ± 0.00 | 0.57 ± 0.01 | 0.57 ± 0.00 | 0.60 ± 0.01 | 0.51 ± 0.01 | 0.53 ± 0.01 |
| **C24:0** | 1.78 ± 0.10 | 1.38 ± 0.01 | 1.26 ± 0.06 | 1.25 ± 0.01 | 1.30 ± 0.00 | 1.14 ± 0.00 | 1.34 ± 0.03 |
| **SFA** | 35.86 ± 0.33 | 34.72 ± 0.32 | 34.09 ± 0.05 | 33.87 ± 0.04 | 34.36 ± 0.23 | 32.50 ± 0.04 | 31.39 ± 0.01 |
| **MUFA** | 46.90 ± 0.03 | 51.33 ± 0.18 | 52.46 ± 0.06 | 53.13 ± 0.01 | 52.73 ± 0.21 | 54.97 ± 0.16 | 56.68 ± 0.13 |
| **PUFA** | 17.26 ± 0.30 | 13.96 ± 0.15 | 13.46 ± 0.11 | 13.01 ± 0.01 | 12.91 ± 0.02 | 12.55 ± 0.21 | 11.95 ± 0.13 |
| **MUFA/PUFA** | 2.72 ± 0.05 | 3.68 ± 0.03 | 3.90 ± 0.04 | 4.08 ± 0.00 | 4.09 ± 0.01 | 4.38 ± 0.08 | 4.75 ± 0.06 |
| **UFA/SFA** | 1.79 ± 0.03 | 1.88 ± 0.03 | 1.93 ± 0.00 | 1.95 ± 0.00 | 1.91 ± 0.02 | 2.08 ± 0.00 | 2.19 ± 0.00 |
| **168 h** | **IFO** | **PGI26** | **PGI28** | **NAR13** | **NAR16** | **PMA5** | **PMA6** |
| **C16:0** | 19.77 ± 0.01 | 21.50 ± 0.98 | 20.63 ± 0.37 | 19.57 ± 0.12 | 19.60 ± 0.54 | 20.94 ± 0.25 | 19.72 ± 0.06 |
| **C16:1** | 0.27 ± 0.01 | 0.30 ± 0.03 | 0.28 ± 0.01 | 0.25 ± 0.00 | 0.24 ± 0.01 | 0.35 ± 0.01 | 0.35 ± 0.01 |
| **C18:0** | 12.15 ± 0.22 | 10.24 ± 0.54 | 10.71 ± 0.32 | 11.58 ± 0.03 | 12.00 ± 0.16 | 8.90 ± 0.45 | 9.00 ± 0.08 |
| **C18:1** | 46.94 ± 0.11 | 51.31 ± 0.45 | 52.43 ± 0.17 | 53.10 ± 0.03 | 52.72 ± 0.20 | 54.95 ± 0.05 | 56.64 ± 0.13 |
| **C18:2** | 14.77 ± 0.14 | 12.35 ± 0.11 | 11.72 ± 0.14 | 10.79 ± 0.16 | 10.58 ± 0.18 | 11.10 ± 0.28 | 10.24 ± 0.04 |
| **C18:3** | 3.28 ± 0.08 | 2.04 ± 0.00 | 2.06 ± 0.06 | 2.43 ± 0.05 | 2.63 ± 0.08 | 0.97 ± 0.03 | 0.76 ± 0.01 |
| **PuA** | - | 0.12 ± 0.00 | 0.09 ± 0.00 | 0.13 ± 0.00 | 0.07 ± 0.00 | 0.96 ± 0.01 | 1.25 ± 0.02 |
| **C20:0** | 0.37 ± 0.01 | 0.31 ± 0.01 | 0.33 ± 0.01 | 0.35 ± 0.00 | 0.36 ± 0.01 | 0.29 ± 0.02 | 0.30 ± 0.01 |
| **C22:0** | 0.67 ± 0.02 | 0.54 ± 0.03 | 0.54 ± 0.03 | 0.56 ± 0.01 | 0.57 ± 0.01 | 0.48 ± 0.04 | 0.50 ± 0.01 |
| **C24:0** | 1.81 ± 0.07 | 1.31 ± 0.09 | 1.22 ± 0.07 | 1.24 ± 0.02 | 1.26 ± 0.05 | 1.09 ± 0.13 | 1.28 ± 0.07 |
| **SFA** | 34.75 ± 0.33 | 33.89 ± 0.30 | 33.43 ± 0.06 | 33.29 ± 0.18 | 33.78 ± 0.45 | 31.68 ± 0.38 | 30.79 ± 0.08 |
| **MUFA** | 47.21 ± 0.12 | 51.61 ± 0.42 | 52.71 ± 0.16 | 53.35 ± 0.03 | 52.96 ± 0.19 | 55.30 ± 0.06 | 56.99 ± 0.12 |
| **PUFA** | 18.05 ± 0.23 | 14.51 ± 0.11 | 13.87 ± 0.21 | 13.35 ± 0.21 | 13.27 ± 0.25 | 13.03 ± 0.32 | 12.24 ± 0.05 |
| **MUFA/PUFA** | 2.62 ± 0.03 | 3.56 ± 0.06 | 3.80 ± 0.07 | 4.00 ± 0.06 | 3.99 ± 0.06 | 4.25 ± 0.10 | 4.66 ± 0.03 |
| **UFA/SFA** | 1.88 ± 0.03 | 1.95 ± 0.03 | 1.99 ± 0.01 | 2.00 ± 0.02 | 1.96 ± 0.04 | 2.16 ± 0.04 | 2.25 ± 0.01 |

Abbreviations: MUFA, monounsaturated fatty acids; PuA, punicic acid; PUFA, polyunsaturated fatty acids; SFA, saturated fatty acids; UFA, unsaturated fatty acids.

**Table S4.** Fatty acid composition of wild type strain IFO0880 and *PgFADX-*expressing strains cultivated in MedA+ medium containing 6% crude glycerol for 72 h, 120 h, and 168 h.

| **72 h** | **IFO** | **PGI26** | **PGI28** | **NAR13** | **NAR16** | **PMA5** | **PMA6** |
| --- | --- | --- | --- | --- | --- | --- | --- |
| **C16:0** | 17.65 ± 0.50 | 19.11 ± 0.47 | 18.67 ± 0.67 | 18.25 ± 0.62 | 17.67 ± 0.01 | 20.07 ± 0.63 | 18.02 ± 0.11 |
| **C16:1** | 0.34 ± 0.01 | 0.40 ± 0.02 | 0.37 ± 0.01 | 0.40 ± 0.02 | 0.37 ± 0.00 | 0.53 ± 0.02 | 0.45 ± 0.01 |
| **C18:0** | 17.84 ± 0.54 | 16.45 ± 0.62 | 17.11 ± 0.39 | 16.66 ± 0.42 | 17.01 ± 0.00 | 13.67 ± 0.42 | 15.22 ± 0.15 |
| **C18:1** | 47.07 ± 0.06 | 47.89 ± 0.33 | 46.88 ± 0.25 | 45.82 ± 0.04 | 46.22 ± 0.29 | 51.79 ± 0.22 | 51.61 ± 0.11 |
| **C18:2** | 11.98 ± 0.01 | 11.50 ± 0.09 | 12.09 ± 0.06 | 13.36 ± 0.14 | 13.27 ± 0.21 | 10.18 ± 0.05 | 10.47 ± 0.03 |
| **C18:3** | 2.01 ± 0.02 | 1.69 ± 0.06 | 1.90 ± 0.05 | 2.12 ± 0.04 | 2.10 ± 0.02 | 0.74 ± 0.01 | 0.80 ± 0.01 |
| **PuA** | - | 0.04 ± 0.00 | 0.04 ± 0.01 | 0.14 ± 0.01 | 0.09 ± 0.01 | 0.89 ± 0.08 | 0.75 ± 0.00 |
| **C20:0** | 0.54 ± 0.01 | 0.50 ± 0.02 | 0.51 ± 0.02 | 0.50 ± 0.01 | 0.51 ± 0.00 | 0.41 ± 0.01 | 0.48 ± 0.01 |
| **C22:0** | 0.81 ± 0.02 | 0.75 ± 0.01 | 0.77 ± 0.01 | 0.80 ± 0.02 | 0.81 ± 0.01 | 0.61 ± 0.01 | 0.71 ± 0.01 |
| **C24:0** | 1.78 ± 0.01 | 1.68 ± 0.02 | 1.69 ± 0.01 | 1.99 ± 0.04 | 1.98 ± 0.04 | 1.14 ± 0.00 | 1.54 ± 0.02 |
| **SFA** | 38.61 ± 0.08 | 38.48 ± 0.21 | 38.73 ± 0.24 | 38.19 ± 0.12 | 37.97 ± 0.06 | 35.90 ± 0.18 | 35.95 ± 0.08 |
| **MUFA** | 47.41 ± 0.07 | 48.29 ± 0.35 | 47.25 ± 0.24 | 46.21 ± 0.06 | 46.59 ± 0.29 | 52.31 ± 0.20 | 52.05 ± 0.11 |
| **PUFA** | 13.99 ± 0.01 | 13.22 ± 0.16 | 14.02 ± 0.01 | 15.61 ± 0.17 | 15.45 ± 0.23 | 11.80 ± 0.03 | 12.02 ± 0.04 |
| **MUFA/PUFA** | 3.39 ± 0.00 | 3.65 ± 0.07 | 3.37 ± 0.02 | 2.96 ± 0.04 | 3.02 ± 0.06 | 4.43 ± 0.03 | 4.33 ± 0.02 |
| **UFA/SFA** | 1.59 ± 0.01 | 1.60 ± 0.01 | 1.58 ± 0.02 | 1.62 ± 0.01 | 1.63 ± 0.00 | 1.79 ± 0.01 | 1.78 ± 0.01 |
| **120 h** | **IFO** | **PGI26** | **PGI28** | **NAR13** | **NAR16** | **PMA5** | **PMA6** |
| **C16:0** | 17.31 ± 0.31 | 18.86 ± 0.27 | 18.11 ± 0.37 | 19.00 ± 1.12 | 18.24 ± 0.41 | 19.73 ± 0.64 | 17.83 ± 0.24 |
| **C16:1** | 0.35 ± 0.01 | 0.41 ± 0.01 | 0.38 ± 0.01 | 0.41 ± 0.04 | 0.39 ± 0.01 | 0.53 ± 0.04 | 0.45 ± 0.01 |
| **C18:0** | 17.46 ± 0.21 | 15.85 ± 0.33 | 16.78 ± 0.10 | 16.12 ± 0.78 | 16.55 ± 0.42 | 13.63 ± 0.47 | 14.94 ± 0.23 |
| **C18:1** | 49.13 ± 0.00 | 49.89 ± 0.34 | 49.42 ± 0.23 | 47.90 ± 0.28 | 48.57 ± 0.12 | 52.79 ± 0.16 | 52.80 ± 0.06 |
| **C18:2** | 11.07 ± 0.08 | 10.66 ± 0.17 | 10.89 ± 0.13 | 11.72 ± 0.06 | 11.55 ± 0.09 | 9.73 ± 0.06 | 9.95 ± 0.04 |
| **C18:3** | 1.92 ± 0.01 | 1.67 ± 0.07 | 1.76 ± 0.02 | 1.96 ± 0.01 | 1.84 ± 0.02 | 0.87 ± 0.02 | 0.90 ± 0.01 |
| **PuA** | - | 0.03 ± 0.00 | 0.03 ± 0.01 | 0.14 ± 0.01 | 0.13 ± 0.01 | 0.69 ± 0.06 | 0.60 ± 0.00 |
| **C20:0** | 0.56 ± 0.01 | 0.51 ± 0.01 | 0.55 ± 0.01 | 0.49 ± 0.02 | 0.51 ± 0.01 | 0.44 ± 0.02 | 0.50 ± 0.01 |
| **C22:0** | 0.78 ± 0.01 | 0.73 ± 0.01 | 0.75 ± 0.01 | 0.73 ± 0.01 | 0.74 ± 0.01 | 0.62 ± 0.01 | 0.71 ± 0.01 |
| **C24:0** | 1.45 ± 0.01 | 1.39 ± 0.04 | 1.37 ± 0.04 | 1.53 ± 0.01 | 1.51 ± 0.01 | 1.01 ± 0.01 | 1.34 ± 0.02 |
| **SFA** | 37.56 ± 0.06 | 37.32 ± 0.11 | 37.54 ± 0.33 | 37.86 ± 0.31 | 37.54 ± 0.03 | 35.41 ± 0.15 | 35.31 ± 0.03 |
| **MUFA** | 49.48 ± 0.01 | 50.30 ± 0.35 | 49.80 ± 0.22 | 48.31 ± 0.24 | 48.96 ± 0.13 | 53.31 ± 0.13 | 53.25 ± 0.07 |
| **PUFA** | 12.98 ± 0.07 | 12.36 ± 0.24 | 12.67 ± 0.11 | 13.82 ± 0.06 | 13.51 ± 0.11 | 11.28 ± 0.01 | 11.44 ± 0.04 |
| **MUFA/PUFA** | 3.81 ± 0.02 | 4.07 ± 0.11 | 3.93 ± 0.02 | 3.50 ± 0.00 | 3.63 ± 0.04 | 4.73 ± 0.01 | 4.65 ± 0.02 |
| **UFA/SFA** | 1.66 ± 0.00 | 1.68 ± 0.01 | 1.66 ± 0.02 | 1.64 ± 0.02 | 1.66 ± 0.00 | 1.82 ± 0.01 | 1.83 ± 0.00 |
| **168 h** | **IFO** | **PGI26** | **PGI28** | **NAR13** | **NAR16** | **PMA5** | **PMA6** |
| **C16:0** | 17.08 ± 0.32 | 18.71 ± 0.04 | 17.86 ± 0.72 | 18.74 ± 1.12 | 17.90 ± 0.26 | 19.45 ± 0.74 | 17.54 ± 0.10 |
| **C16:1** | 0.36 ± 0.01 | 0.44 ± 0.01 | 0.39 ± 0.03 | 0.43 ± 0.04 | 0.41 ± 0.01 | 0.54 ± 0.04 | 0.46 ± 0.00 |
| **C18:0** | 16.82 ± 0.28 | 15.20 ± 0.14 | 16.20 ± 0.46 | 15.59 ± 0.86 | 15.94 ± 0.33 | 13.28 ± 0.50 | 14.45 ± 0.01 |
| **C18:1** | 49.77 ± 0.01 | 50.51 ± 0.57 | 50.25 ± 0.40 | 49.40 ± 0.21 | 50.10 ± 0.31 | 53.32 ± 0.22 | 53.25 ± 0.03 |
| **C18:2** | 11.28 ± 0.00 | 10.88 ± 0.28 | 10.93 ± 0.11 | 11.25 ± 0.02 | 11.15 ± 0.18 | 9.82 ± 0.04 | 10.27 ± 0.11 |
| **C18:3** | 2.06 ± 0.01 | 1.76 ± 0.06 | 1.82 ± 0.06 | 1.86 ± 0.04 | 1.72 ± 0.06 | 0.93 ± 0.01 | 0.99 ± 0.01 |
| **PuA** | - | 0.03 ± 0.00 | 0.03 ± 0.01 | 0.26 ± 0.04 | 0.29 ± 0.02 | 0.68 ± 0.06 | 0.61 ± 0.01 |
| **C20:0** | 0.56 ± 0.01 | 0.50 ± 0.00 | 0.54 ± 0.03 | 0.50 ± 0.04 | 0.52 ± 0.01 | 0.45 ± 0.02 | 0.50 ± 0.00 |
| **C22:0** | 0.76 ± 0.02 | 0.71 ± 0.01 | 0.74 ± 0.02 | 0.70 ± 0.03 | 0.71 ± 0.01 | 0.62 ± 0.02 | 0.69 ± 0.00 |
| **C24:0** | 1.33 ± 0.04 | 1.29 ± 0.05 | 1.28 ± 0.01 | 1.30 ± 0.01 | 1.29 ± 0.01 | 0.95 ± 0.01 | 1.25 ± 0.01 |
| **SFA** | 36.54 ± 0.04 | 36.40 ± 0.23 | 36.61 ± 0.21 | 36.82 ± 0.18 | 36.35 ± 0.11 | 34.74 ± 0.18 | 34.43 ± 0.09 |
| **MUFA** | 50.13 ± 0.02 | 50.95 ± 0.57 | 50.64 ± 0.37 | 49.83 ± 0.16 | 50.51 ± 0.33 | 53.85 ± 0.18 | 53.71 ± 0.03 |
| **PUFA** | 13.34 ± 0.01 | 12.66 ± 0.34 | 12.77 ± 0.18 | 13.36 ± 0.02 | 13.15 ± 0.21 | 11.43 ± 0.01 | 11.86 ± 0.11 |
| **MUFA/PUFA** | 3.76 ± 0.00 | 4.03 ± 0.15 | 3.97 ± 0.08 | 3.73 ± 0.01 | 3.84 ± 0.09 | 4.71 ± 0.02 | 4.53 ± 0.05 |
| **UFA/SFA** | 1.74 ± 0.00 | 1.75 ± 0.02 | 1.73 ± 0.02 | 1.72 ± 0.01 | 1.75 ± 0.01 | 1.88 ± 0.01 | 1.90 ± 0.01 |

Abbreviations: MUFA, monounsaturated fatty acids; PuA, punicic acid; PUFA, polyunsaturated fatty acids; SFA, saturated fatty acids; UFA, unsaturated fatty acids.
